# Supplementary material for: Elements and COVID-19: A Comprehensive Overview of Studies on Their Blood/Urinary Levels and Supplementation with an Update on Clinical Trials
Source: MDPI journal article supplement (doi:10.3390/biology11020215), 2022-01-28
Supplement: s1 [file s1]

**Table S1.** Summary of results for essential and toxic elements: COVID-19 patients

| Element          | Patients<br>(disease status) | Region               | Number<br>Sex            | Age<br>(mean/median/range) | MeCon<br>(mean/median)* | Samples | Normal<br>values** | Unit   | Ref.  |
|------------------|------------------------------|----------------------|--------------------------|----------------------------|-------------------------|---------|--------------------|--------|-------|
| <b>Fe</b>        |                              |                      |                          |                            |                         |         |                    |        |       |
|                  | Control                      | Moscow, Russia       | n = 43, 27 (♂), 16 (♀)   | 55.67                      | 1.87                    | Serum   | n/a                | µg/mL  | [171] |
|                  | Mild                         |                      | n = 50, 25 (♂), 25 (♀)   | 50.47                      | 1.32                    | -/-     |                    | -/-    |       |
|                  | Moderate                     |                      | n = 50, 31 (♂), 19 (♀)   | 54.22                      | 1.34                    | -/-     |                    | -/-    |       |
|                  | Severe                       |                      | n = 50, 25 (♂), 25 (♀)   | 64.5                       | 1.33                    | -/-     |                    | -/-    |       |
|                  | Mild                         | n/a                  | n = 22                   | 58                         | 18                      | Serum   | n/a                | µmol/L | [35]  |
|                  | Moderate                     |                      | n = 34                   |                            | 16                      | -/-     |                    | -/-    |       |
|                  | Severe                       |                      | n = 53                   |                            | 15                      | -/-     |                    | -/-    |       |
|                  | Non-severe                   | Wuhan, Hubei         | n = 202, 88 (♂), 114 (♀) | 69                         | 436.8                   | WB      | 406.5- 576.7       | mg/L   | [163] |
|                  | Severe                       | Province, China      | n = 104, 60 (♂), 44 (♀)  | 58                         | 370.24                  | -/-     |                    | -/-    |       |
|                  | Mild                         |                      | n = 19                   | 49 (36-65)                 | 6.6                     | Serum   | 7.8-32.3           | µmol/L | [159] |
|                  | Severe                       |                      | n = 18                   | 55 (46-63)                 | 4.9                     | -/-     |                    | -/-    |       |
|                  | Critical                     |                      | n = 13                   | 66 (56-74)                 | 5.2                     | -/-     |                    | -/-    |       |
| <b>Fe as FER</b> |                              |                      |                          |                            |                         |         |                    |        |       |
|                  | Mild                         | n/a                  | n = 22                   | 58                         | 139                     | Serum   | n/a                | µg/L   | [35]  |
|                  | Moderate                     |                      | n = 34                   |                            | 260                     | -/-     |                    | -/-    |       |
|                  | Severe                       |                      | n = 53                   |                            | 317                     | -/-     |                    | -/-    |       |
|                  | Non-severe                   | Riyadh, Saudi Arabia | n = 45                   | 47.3                       | 331.24                  | Serum   | 12-300             | ng/mL  | [157] |
|                  | Severe                       |                      | n = 35                   | 58.2                       | 1174.95                 | -/-     |                    | -/-    |       |
|                  | Mild / Moderate              | Sakai, Osaka, Japan  | n = 22, 12 (♂), 10 (♀)   | ≥ 65                       | 458                     | Serum   | n/a                | ng/mL  | [162] |
|                  | Severe                       |                      | n = 7, 4 (♂), 3 (♀)      | ≥ 65                       | 956                     | -/-     |                    | -/-    |       |
| <b>Zn</b>        |                              |                      |                          |                            |                         |         |                    |        |       |
|                  | Control                      | Jigawa, Northwestern | n = 21                   | 35.8                       | 64.9                    | Plasma  | n/a                | µg/dL  | [172] |
|                  | Positive                     | Nigeria              | n = 50                   | 43.8                       | 58.1                    | -/-     |                    | -/-    |       |
|                  | Control                      | Chennai, India       | n = 45                   | 32                         | 105.8                   | Serum   | 80-120             | µg/dL  | [38]  |
|                  | Positive                     |                      | n = 47                   | 34                         | 74.5                    | -/-     |                    | -/-    |       |
|                  | Control                      | Shoushtar city, Iran | n = 186                  | 51                         | 86.66                   | Serum   | 70-127             | µg/dL  | [173] |
|                  | Positive                     |                      | n = 93                   |                            | 67.61                   | -/-     |                    | -/-    |       |
|                  | Control                      | Chennai, India       | n = 45                   | 34 (18-77)                 | 105.8                   | Serum   | n/a                | µg/dL  | [38]  |
|                  | Positive                     |                      | n = 47                   | 32 (18-60)                 | 74.5                    | -/-     |                    | -/-    |       |
|                  | Control                      | Moscow, Russia       | n = 43, 27 (♂), 16 (♀)   | 55.67                      | 0.96                    | Serum   | n/a                | µg/mL  | [171] |
|                  | Mild                         |                      | n = 50, 25 (♂), 25 (♀)   | 50.47                      | 0.92                    | -/-     |                    | -/-    |       |
|                  | Moderate                     |                      | n = 50, 31 (♂), 19 (♀)   | 54.22                      | 0.90                    | -/-     |                    | -/-    |       |
|                  | Severe                       |                      | n = 50, 25 (♂), 25 (♀)   | 64.5                       | 0.87                    | -/-     |                    | -/-    |       |
|                  | Control                      | Germany              | n = 35                   | 70                         | 975.7                   | Serum   | n/a                | µg/L   | [80]  |
|                  | Positive                     |                      |                          | 70                         | 717.4                   | -/-     |                    | -/-    |       |
|                  | Non-survivors                |                      |                          | 89                         | < 638.7                 | -/-     |                    | -/-    |       |
|                  | Non-severe                   | Riyadh, Saudi Arabia | n = 45                   | 47.3                       | 124.57                  | Serum   | 66-110             | µg/dL  | [157] |

|                         |                      |                          |                |                    |        |                         |              |
|-------------------------|----------------------|--------------------------|----------------|--------------------|--------|-------------------------|--------------|
| Severe                  |                      | n = 35                   | 58.2           | 116.37             | -/-    | -/-                     |              |
| Non-severe              | Wuhan, Hubei         | n = 202, 88 (♂), 114 (♀) | 69             | 6.61               | WB     | 4.3-7.8                 | mg/L [163]   |
| Severe                  | Province, China      | n = 104, 60 (♂), 44 (♀)  | 58             | 6.18               | -/-    | -/-                     |              |
| Mild / Moderate         | Sakai, Osaka, Japan  | n = 22, 12 (♂)           | ≥ 65           | 87.7               | Serum  | n/a                     | μg/dL [162]  |
| Severe                  |                      | n = 7, 4 (♂)             | ≥ 65           | 62.4               | -/-    | -/-                     |              |
| Mild                    | Qena, Upper Egypt    | n = 45, 24 (♂), 21 (♀)   | 31.8           | 0.67               | Serum  | n/a                     | μg/mL [167]  |
| Common                  |                      | n = 57, 33 (♂), 24 (♀)   | 47.8           | 0.62               | -/-    | -/-                     |              |
| Severe                  |                      | n = 21, 15 (♂), 6 (♀)    | 59.1           | 0.73               | -/-    | -/-                     |              |
| Extremely severe        |                      | n = 11, 6 (♂), 5 (♀)     | 69.5           | 0.72               | -/-    | -/-                     |              |
| GCO group               | n/a                  | n = 200                  | 49.4           | 970                | Plasma | n/a                     | μg/L [158]   |
| PCO group               |                      | n = 75                   | 64.1           | 840                | -/-    | -/-                     |              |
| Non-severe              | Tabriz, Iran         | n = 114, 58 (♂), 56 (♀)  | 56.72          | 68.42              | Serum  | 72.6-127 (♂)            | μg/dL [174]  |
| Severe                  |                      | n = 112, 56 (♂), 56 (♀)  | 56             | 67.30              | -/-    | 77.0-114 (♀)            | -/-          |
| Recovered               |                      |                          |                | 69.66              | -/-    | -/-                     | -/-          |
| Deceased                |                      |                          |                | 62.43              | -/-    | -/-                     | -/-          |
| Non-severe              | Wuhan, Hubei         | n = 202, 88 (♂), 114 (♀) | 69             | 6.61               | WB     | 4.3-7.8                 | mg/L [163]   |
| Severe                  | Province, China      | n = 104, 60 (♂), 44 (♀)  | 58             | 6.18               | -/-    | -/-                     |              |
| <b>Cu</b>               |                      |                          |                |                    |        |                         |              |
| Control                 | Jigawa, Northwestern | n = 21                   | 35.8           | 136.5              | Plasma | n/a                     | μg/dL [172]  |
| Positive                | Nigeria              | n = 50                   | 43.8           | 128.3              | -/-    | -/-                     |              |
| Control                 | Moscow, Russia       | n = 43, 27 (♂), 16 (♀)   | 55.67          | 1.13               | Serum  | n/a                     | μg/mL [171]  |
| Mild                    |                      | n = 50, 25 (♂), 25 (♀)   | 50.47          | 1.27               | -/-    | -/-                     |              |
| Moderate                |                      | n = 50, 31 (♂), 19 (♀)   | 54.22          | 1.46               | -/-    | -/-                     |              |
| Severe                  |                      | n = 50, 25 (♂), 25 (♀)   | 64.5           | 1.33               | -/-    | -/-                     |              |
| Non-severe              | Riyadh, Saudi Arabia | n = 45                   | 47.3           | 18.35              | Serum  | 10–22                   | μmol/L [157] |
| Severe                  |                      | n = 35                   | 58.2           | 18.2               | -/-    | -/-                     |              |
| Non-severe              | Wuhan, Hubei         | n = 202, 88 (♂), 114 (♀) | 69             | 838.55             | WB     | 634.1-999.4             | μg /L [163]  |
| Severe                  | Province, China      | n = 104, 60 (♂), 44 (♀)  | 58             | 929.73             | -/-    | -/-                     |              |
| Survivors               | Aschaffenburg-       | n = 28, 13 (♂), 15 (♀)   | 69             | 1475.9             | Serum  | 897.8-1906.0            | μg /L [175]  |
| Non-survivors           | Alzenau, Germany     | n = 7, 2 (♂), 5 (♀)      | 89             | 1317.9             | -/-    | -/-                     |              |
| Intermediate care group | n/a                  | n = 35                   | 65             | ~ 140 #            | Serum  | n/a                     | μg/dL [168]  |
| ICU group               |                      |                          |                | < 100              | -/-    | -/-                     |              |
| Non-severe              | Wuhan, Hubei         | n = 70, 38 (♂), 32 (♀)   | 60             | 15.84              | Urine  | 4-21.42                 | μg/L [164]   |
|                         | Province, China      |                          |                | 15.55 <sup>κ</sup> | -/-    | 4.39-13.37 <sup>κ</sup> | μg/g         |
| Severe                  |                      | n = 68, 41 (♂), 27 (♀)   | 65             | 32.14              | -/-    | -/-                     | μg/L         |
|                         |                      |                          |                | 77.71 <sup>κ</sup> | -/-    | -/-                     | μg/g         |
| <b>Se</b>               |                      |                          |                |                    |        |                         |              |
| Control                 | India                | n = 30, 14 (♂), 16 (♀)   | 33.5 (37.5-43) | 79.1               | Serum  | 70-150                  | ng/mL [176]  |
| Positive                |                      | n = 30, 24 (♂), 6 (♀)    | 40.5 (26-37)   | 69.3               | -/-    | -/-                     |              |
| Control                 | Jigawa, Northwestern | n = 21                   | 35.8           | 29.1               | Plasma | n/a                     | ng/dL [172]  |
| Positive                | Nigeria              | n = 50                   | 43.8           | 25.3               | -/-    | -/-                     |              |
| Control                 | Moscow, Russia       | n = 43, 27 (♂), 16 (♀)   | 55.67          | 0.102              | Serum  | n/a                     | μg/mL [171]  |
| Mild                    |                      | n = 50, 25 (♂), 25 (♀)   | 50.47          | 0.093              | -/-    | -/-                     |              |
| Moderate                |                      | n = 50, 31 (♂), 19 (♀)   | 54.22          | 0.090              | -/-    | -/-                     |              |

|               |                   |                              |                          |                    |                                 |              |                                             |                    |
|---------------|-------------------|------------------------------|--------------------------|--------------------|---------------------------------|--------------|---------------------------------------------|--------------------|
| Se-P          | Severe            | Riyadh, Saudi Arabia         | n = 50, 25 (♂), 25 (♀)   | 64.5               | 0.087                           | -/-          | -/-                                         |                    |
|               | Non-severe        |                              | n = 45                   | 47.3               | 134                             | Serum        | 70-150                                      | µg/L [157]         |
|               | Severe            |                              | n = 35                   | 58.2               | 162                             | -/-          | -/-                                         |                    |
|               | Non-severe        | Wuhan, Hubei Province, China | n = 70, 38 (♂), 32 (♀)   | 60                 | 25.55<br>27.65 <sup>&amp;</sup> | Urine<br>-/- | 10.46-82.71<br>15.86-38.13 <sup>&amp;</sup> | µg/L<br>µg/g [164] |
|               | Severe            |                              | n = 68, 41 (♂), 27 (♀)   | 65                 | 20.27<br>45.63 <sup>&amp;</sup> | -/-<br>-/-   | µg/L<br>µg/g                                |                    |
|               | Mild              |                              | Tehran, Iran             | n = 23 (♂), 15 (♀) | 51                              | 47.07        | Serum                                       | 70-150             |
|               | Moderate          | n = 12 (♂), 15 (♀)           |                          | 59                 | 47.36                           | -/-          | -/-                                         |                    |
|               | Severe            | n = 12 (♂), 7 (♀)            |                          | 81                 | 29.86                           | -/-          | -/-                                         |                    |
|               | Survivors         | Alzenau, Germany             | n = 27, 12 (♂), 15 (♀)   | 69                 | 53.3                            | Serum        | 45.7–131.6                                  | µg/L [51]          |
|               | Non-survivors     |                              | n = 6, 2 (♂), 4 (♀)      | 89                 | 40.8                            | -/-          | -/-                                         |                    |
| Survivors     | Alzenau, Germany  | n = 27, 12 (♂), 15 (♀)       | 69                       | 3.3                | Serum                           | 2.56–6.63    | mg/L [51]                                   |                    |
| Non-survivors |                   | n = 6, 2 (♂), 4 (♀)          | 89                       | 2.1                | -/-                             | -/-          |                                             |                    |
| Mn            |                   |                              |                          |                    |                                 |              |                                             |                    |
|               | Control, Positive | Jigawa, Northwestern Nigeria | n = 21, n = 50           | 35.8, 43.8         | 2.10, 1.64                      | Plasma       | n/a                                         | mg/dL [172]        |
|               | Non-severe        | Wuhan, Hubei Province, China | n = 202, 88 (♂), 114 (♀) | 69                 | 12.96                           | WB           | 8.1-18.5                                    | µg /L [163]        |
|               | Severe            |                              | n = 104, 60 (♂), 44 (♀)  | 58                 | 10.56                           | -/-          | -/-                                         |                    |
|               | Non-severe        | Wuhan, Hubei Province, China | n = 70, 38 (♂), 32 (♀)   | 60                 | <0.53<br>0.32 <sup>&amp;</sup>  | Urine<br>-/- | <0.53-1.92<br>0.09-1.99 <sup>&amp;</sup>    | µg/L<br>µg/g [164] |
|               | Severe            |                              | n = 68, 41(♂), 27 (♀)    | 65                 | 0.83<br>1.82 <sup>&amp;</sup>   | -/-<br>-/-   | µg/L<br>µg/g                                |                    |
| Cr            |                   |                              |                          |                    |                                 |              |                                             |                    |
|               | Non-severe        | Wuhan, Hubei Province, China | n = 202, 88 (♂), 114 (♀) | 69                 | 0.81                            | WB           | <0.5-0.76                                   | µg /L [163]        |
|               | Severe            |                              | n = 104, 60 (♂), 44 (♀)  | 58                 | 1.03                            | -/-          | -/-                                         |                    |
|               | Non-severe        | Wuhan, Hubei Province, China | n = 70, 38 (♂), 32 (♀)   | 60                 | 0.88<br>0.87 <sup>&amp;</sup>   | Urine<br>-/- | <0.24-0.5<br>0.05-0.43 <sup>&amp;</sup>     | µg/L<br>µg/g [164] |
|               | Severe            |                              | n = 68, 41(♂), 27 (♀)    | 65                 | 1.96<br>4.01 <sup>&amp;</sup>   | -/-<br>-/-   | µg/L<br>µg/g                                |                    |
| Cd            |                   |                              |                          |                    |                                 |              |                                             |                    |
|               | Non-severe        | Wuhan, Hubei Province, China | n = 202, 88 (♂), 114 (♀) | 69                 | 0.71                            | WB           | 0.22 -6.44                                  | µg /L [163]        |
|               | Severe            |                              | n = 104, 60 (♂), 44 (♀)  | 58                 | 0.7                             | -/-          | -/-                                         |                    |
|               | Non-severe        | Wuhan, Hubei Province, China | n = 70, 38 (♂), 32 (♀)   | 60                 | 0.95<br>1.01 <sup>&amp;</sup>   | Urine<br>-/- | 0.34-3.39<br>0.27-2.23 <sup>&amp;</sup>     | µg/L<br>µg/g [164] |
|               | Severe            |                              | n = 68, 41 (♂), 27 (♀)   | 65                 | 1.49<br>2.96 <sup>&amp;</sup>   | -/-<br>-/-   | µg/L<br>µg/g                                |                    |
| Hg            |                   |                              |                          |                    |                                 |              |                                             |                    |
|               | Non-severe        | Wuhan, Hubei Province, China | n = 202, 88 (♂), 114 (♀) | 69                 | 1.68                            | WB           | <1.15-5.97                                  | µg /L [163]        |
|               | Severe            |                              | n = 104, 60 (♂), 44 (♀)  | 58                 | 1.45                            | -/-          | -/-                                         |                    |
|               | Non-severe        | Wuhan, Hubei Province, China | n = 70, 38 (♂), 32 (♀)   | 60                 | 0.75<br>0.81 <sup>&amp;</sup>   | Urine<br>-/- | <0.72-2.16<br>0.15-1.62 <sup>&amp;</sup>    | µg/L<br>µg/g [164] |
|               | Severe            |                              | n = 68, 41 (♂), 27 (♀)   | 65                 | <0.72<br>1.54 <sup>&amp;</sup>  | -/-<br>-/-   | µg/L<br>µg/g                                |                    |
| Pb            |                   |                              |                          |                    |                                 |              |                                             |                    |

|            |                 |                          |    |                   |       |                        |       |       |
|------------|-----------------|--------------------------|----|-------------------|-------|------------------------|-------|-------|
| Non-severe | Wuhan, Hubei    | n = 202, 88 (♂), 114 (♀) | 69 | 12.37             | WB    | 8.7-48.1               | µg /L | [163] |
| Severe     | Province, China | n = 104, 60 (♂), 44 (♀)  | 58 | 10.57             | -/-   |                        | -/-   |       |
| Non-severe | Wuhan, Hubei    | n = 70, 38 (♂), 32 (♀)   | 60 | 0.82              | Urine | 0.24-2.29              | µg/L  | [164] |
|            | Province, China |                          |    | 0.86 <sup>κ</sup> | -/-   | 0.26-1.91 <sup>κ</sup> | µg/g  |       |
| Severe     |                 | n = 68, 41 (♂), 27 (♀)   | 65 | 0.83              | -/-   |                        | µg/L  |       |
|            |                 |                          |    | 1.85 <sup>κ</sup> | -/-   |                        | µg/g  |       |

\*, \*\* All values are given as reported in the cited publications; <sup>#</sup> approximate value. n: number of patients; n/a: not available; Fe: iron; Zn: zinc; Cu: copper; Se: selenium; Mn: manganese; Cr: chromium; Cd: cadmium; Hg: mercury; Pb: lead; FER: ferritin; MeCon: metal concentration; WB: whole blood; Se-P: selenoprotein P; ICU: Intensive Care Unit; GCO group: good clinical outcome group; PCO group: poor clinical outcome group; <sup>κ</sup> creatinine adjusted analyte level.

**Table S2.** Summary of results for macroelements: COVID-19 patients

| Element   | Patients<br>(disease status) | Region           | Number<br>Sex             | Age<br>(mean/median/range) | MeCon<br>(mean/median)* | Samples | Normal<br>values** | Unit   | Ref.  |
|-----------|------------------------------|------------------|---------------------------|----------------------------|-------------------------|---------|--------------------|--------|-------|
| <b>Mg</b> |                              |                  |                           |                            |                         |         |                    |        |       |
|           | Non-severe                   | Wuhan, Hubei     | n = 202, 88 (♂), 114 (♀)  | 69                         | 39.46                   | WB      | 31.9- 48.0         | mg/L   | [163] |
|           | Severe                       | province, China  | n = 104, 60 (♂), 44 (♀)   | 58                         | 38.33                   | -//-    | -//-               | -//-   |       |
|           | Discharge                    | Tehran, Iran     | n = 396, 271 (♂), 125 (♀) | 60.4                       | 1.83                    | Blood   | 1.5- 2.5           | mmol/L | [187] |
|           | Expire                       |                  | n = 63, 49 (♂), 14 (♀)    | 70.6                       | 1.61                    | -//-    | -//-               | -//-   |       |
|           | Moderate                     | Nancy, France    | n = 43, 16 (♂), 27 (♀)    | 67.4                       | 0.73                    | Serum   | 0.85- 0.95         | mmol/L | [186] |
|           | Severe                       |                  | n = 108, 63 (♂), 45 (♀)   | 71.6                       | 0.77                    | -//-    | -//-               | -//-   |       |
|           | Critical                     |                  | n = 149, 104 (♂), 45 (♀)  | 63                         | 0.79                    | -//-    | -//-               | -//-   |       |
| <b>Na</b> |                              |                  |                           |                            |                         |         |                    |        |       |
|           | Non-severe                   | Riyadh, Saudi    | n = 45                    | 47.3                       | 138.0                   | Serum   | n/a                | mmol/L | [157] |
|           | Severe                       | Arabia           | n = 35                    | 58.2                       | 136.58                  | -//-    | -//-               | -//-   |       |
|           | Mild                         | Zhejiang         | n = 82                    | 49                         | 139.6                   | Serum   | 137- 147           | mmol/L | [188] |
|           | Severe                       | province, China  | n = 9                     | 66                         | 137.85                  | -//-    | -//-               | -//-   |       |
|           | Mild                         | Chongqing        | n = 45                    | 44                         | 139                     | Plasma  | n/a                | mmol/L | [192] |
|           | Severe                       | China            | n = 40                    | 56                         | 136.5                   | -//-    | -//-               | -//-   |       |
| <b>K</b>  |                              |                  |                           |                            |                         |         |                    |        |       |
|           | Control                      | Modena, Italy    | n = 171                   | 64.1                       | 4.0                     | Serum   | 3.5-5.3            | mmol/L | [198] |
|           | Hypokalemic                  |                  | n = 119                   | 65.8                       | 3.1                     | -//-    | -//-               | -//-   |       |
|           | Non-severe                   | Riyadh, Saudi    | n = 45                    | 47.3                       | 4.4                     | Serum   | n/a                | mmol/L | [157] |
|           | Severe                       | Arabia           | n = 35                    | 58.2                       | 4.2                     | -//-    | -//-               | -//-   |       |
|           | Discharge                    | Tehran, Iran     | n = 396, 271 (♂), 125 (♀) | 60.4                       | 3.95                    | Blood   | 3.6- 5             | mmol/L | [187] |
|           | Expire                       |                  | n = 63, 49 (♂), 14 (♀)    | 70.6                       | 3.65                    | -//-    | -//-               | -//-   |       |
|           | Moderate / Mild              | Wenzhou China    | n = 135                   | 46                         | 3.5                     | Plasma  | > 3.5              | mmol/L | [155] |
|           | Severe / Critical            |                  | n = 40                    |                            | 3.2                     | -//-    | -//-               | -//-   |       |
|           | Mild                         | Chongqing        | n = 45                    | 44                         | 4                       | Plasma  | n/a                | mmol/L | [192] |
|           | Severe                       | China            | n = 40                    | 56                         | 3.8                     | -//-    | -//-               | -//-   |       |
| <b>Ca</b> |                              |                  |                           |                            |                         |         |                    |        |       |
|           | Control                      | Hialeah, Florida | n = 72                    | 36.9                       | < 10                    | Serum   | 8.8–10.2           | mg/dL  | [199] |
|           | Non-severe                   |                  | n = 72                    | 37.5                       | < 9                     | -//-    | -//-               | -//-   |       |
|           | Negative                     | Monza, Italy     | n = 165                   | 66 (18-101)                | 2.28                    | Serum   | n/a                | mmol/L | [154] |
|           | Positive                     |                  | n = 420                   |                            | 2.15                    | -//-    | -//-               | -//-   |       |
|           | Negative                     | Shoushtar city,  | n = 186                   | 51                         | 9.50                    | Serum   | 8.6- 10.3          | mg/dL  | [173] |
|           | Positive                     | Iran             | n = 93                    |                            | 9.14                    | -//-    | -//-               | -//-   |       |

|                        |               |                 |                          |             |       |       |            |        |       |
|------------------------|---------------|-----------------|--------------------------|-------------|-------|-------|------------|--------|-------|
|                        | Mild          | Zhejiang        | n = 82                   | 49          | 2.17  | Serum | 2.11- 2.52 | mmol/L | [188] |
|                        | Severe        | province, China | n = 9                    | 66          | 2.01  | -/-   |            | -/-    |       |
|                        | Non-severe    | Wuhan, Hubei    | n = 202, 88 (♂), 114 (♀) | 69          | 63.55 | WB    | 46.9- 66.8 | mg/L   | [163] |
|                        | Severe        | province, China | n = 104, 60 (♂), 44 (♀)  | 58          | 68.20 | -/-   |            | -/-    |       |
|                        | Survivors     | Blida, Algeria  | n = 83                   | 59.5        | 2.2   | Serum | 2.21-.2.48 | mmol/L | [189] |
|                        | Non-survivors |                 | n = 37                   | 68.6        | 2.02  | -/-   |            | -/-    |       |
| <hr/>                  |               |                 |                          |             |       |       |            |        |       |
| <b>Ca<sup>2+</sup></b> |               |                 |                          |             |       |       |            |        |       |
|                        | Negative      | Monza, Italy    | n = 165                  | 66 (18-101) | 1.17  | WB    | n/a        | mmol/L | [154] |
|                        | Positive      |                 | n = 420                  |             | 1.12  | -/-   |            | -/-    |       |
| <hr/>                  |               |                 |                          |             |       |       |            |        |       |
| <b>Cl</b>              |               |                 |                          |             |       |       |            |        |       |
|                        | Non-severe    | Riyadh, Saudi   | n = 45                   | 47.3        | 103.3 | Serum | n/a        | mmol/L | [157] |
|                        | Severe        | Arabia          | n = 35                   | 58.2        | 97.7  | -/-   |            | -/-    |       |

\*, \*\* All values are given as reported in the cited publications. n: number of patients; n/a: not available; Mg: magnesium; Na: sodium; K: potassium; Ca: calcium; Cl: chloride; MeCon: metal concentration; WB: whole blood.

**Table S3.** Summary of clinical trials with zinc (Zn) for COVID-19

| ClinTI                                                       | Official Title                                                                                                                                                                                                                                | Country      | Agents                                 | Zn compound | Zn dose | Frequency/Duration of Zn administration | Patient details             |
|--------------------------------------------------------------|-----------------------------------------------------------------------------------------------------------------------------------------------------------------------------------------------------------------------------------------------|--------------|----------------------------------------|-------------|---------|-----------------------------------------|-----------------------------|
| <b>Participants with COVID-19 / at high risk of COVID-19</b> |                                                                                                                                                                                                                                               |              |                                        |             |         |                                         |                             |
| NCT04370782*                                                 | A Randomized Study Evaluating the Safety and Efficacy of Hydroxychloroquine and Zinc in Combination With Either Azithromycin or Doxycycline for the Treatment of COVID-19 in the Outpatient Setting                                           | USA          | Zn/HCQ/AZM<br>Zn/HCQ/DOXY              | ZnS         | 220 mg  | OD for 5 d                              | n = 750<br>≥ 30 yr<br>♂/♀   |
| NCT04342728*                                                 | Coronavirus Disease 2019- Using Ascorbic Acid and Zinc Supplementation (COVIDatoZ) Research Study A Randomized, Open Label Single Center Study                                                                                                | USA          | Zn and/or AscA<br>ST                   | ZnGLU       | 50 mg   | OD at <i>h.s.</i> for 10 d              | n = 520<br>≥ 18 yr<br>♂/♀   |
| NCT04621461*                                                 | A Randomized, Placebo-Controlled Study Evaluating the Efficacy of Zinc for the Treatment of COVID-19 in the Outpatient Setting                                                                                                                | USA          | Zn<br>Placebo                          | ZnS         | 220 mg  | OD for 5 d                              | n = 3<br>≥ 30 yr<br>♂/♀     |
| CTRI/2020/05/025215*                                         | A prospective, single centre, randomized open labelled comparative clinical study to evaluate the effectiveness of Siddha medicine, Kabasura kudineer and vitamin c-zinc supplementation in the management of asymptomatic COVID 19 patients. | India        | KSK<br>VitC<br>Zn                      | n/a         | 100 mg  | OD for 14 d                             | n = 60<br>18-55 yr<br>♂/♀   |
| IRCT20180425039414N2*                                        | The effect of zinc on the treatment and clinical course of patients with SARS-CoV-2 (COVID-19)                                                                                                                                                | Iran         | Zn<br>HCQ                              | n/a         | 220 mg  | BID                                     | n = 80<br>≥ 18 yr<br>♂/♀    |
| NCT04446104*                                                 | A Randomized Open-label Prophylaxis Trial Among Migrant Workers at High-risk of COVID-19 (DORM Trial)                                                                                                                                         | Singapore    | Zn/VitC<br>HCQ<br>IVM<br>PI<br>VitC    | n/a         | 80 mg   | OD for 42d                              | n = 5000<br>21-60 yr<br>♂   |
| NCT04584567*                                                 | COVID-19 Infection Prophylaxis With Low Dose of Doxycycline and Zinc in Health Care Workers                                                                                                                                                   | Tunisia      | Zn + DOXY<br>DOXY (placebo)<br>Placebo | n/a         | 15 mg   | daily                                   | n = 1100<br>18-65 yr<br>♂/♀ |
| NCT04468139†                                                 | The Study of Quadruple Therapy Zinc, Quercetin, Bromelain and Vitamin C on the Clinical Outcomes of Patients Infected With COVID-19                                                                                                           | Saudi Arabia | Zn<br>QUE<br>BM<br>VitC                | elemental   | 50 mg   | daily                                   | n = 60<br>≥ 18 yr<br>♂/♀    |
| NCT04447534†                                                 | Does Zinc Supplementation Enhance the Clinical Efficacy of Chloroquine / Hydroxychloroquine in Treatment of COVID-19?                                                                                                                         | Egypt        | HCQ + Zn<br>HCQ                        | n/a         | n/a     | n/a                                     | n = 200<br>≥ 18 yr<br>♂/♀   |

|                                   |                                                                                                                                                                                                                                     |              |                                                           |                        |                |                              |                            |
|-----------------------------------|-------------------------------------------------------------------------------------------------------------------------------------------------------------------------------------------------------------------------------------|--------------|-----------------------------------------------------------|------------------------|----------------|------------------------------|----------------------------|
| NCT04384458 <sup>†</sup>          | Comparative Study of Hydroxychloroquine and Ivermectin in COVID-19 Prophylaxis                                                                                                                                                      | Brazil       | HCQ+Zn<br>IVM+Zn                                          | active Zn<br>active Zn | 20 mg<br>20 mg | BID for 50 d<br>BID for 45 d | n = 400<br>18-70 yr<br>♂/♀ |
| NCT04472585 <sup>†</sup>          | Sub-cutaneous Ivermectin in Combination With and Without Oral Zinc: a Placebo Randomized Control Trial on Mild to Moderate COVID-19 Patients                                                                                        | Pakistan     | Zn/ST<br>IVM/ST<br>Zn + IVM/ST<br>Placebo/ST              | ZnS                    | 20 mg          | TID                          | n = 180<br>18-60 yr<br>♂/♀ |
| NCT04395768 <sup>†</sup>          | Therapies to Prevent Progression of COVID-19, Including Hydroxychloroquine, Azithromycin, Zinc, Vitamin D, Vitamin B12 With or Without Vitamin C, a Multi-centre, International, Randomized Trial: The International ALLIANCE Study | Australia    | Zn<br>HCQ<br>AZM<br>VitD3<br>VitB12<br>(+)(-) VitC        | ZnCIT                  | 30 mg          | PO daily                     | n = 200<br>≥ 18 yr<br>♂/♀  |
| NCT04334512 <sup>†</sup>          | A Randomized, Double-Blind, Placebo-Controlled Phase IIa Study of Quintuple Therapy to Treat COVID-19 Infection                                                                                                                     | USA          | Zn<br>HCQ<br>AZM<br>VitC<br>VitD<br>Zn, VitC, D (placebo) | n/a                    | n/a            | 10 d                         | n = 600<br>≥ 18 yr<br>♂/♀  |
| NCT04621149 <sup>†</sup>          | A Phase 2 Screening Study of Candidate Non-prescription Treatments for COVID-19: A Patient-driven, Randomized, Factorial Study Evaluating Patient-reported Outcomes (PROFACT-01)                                                    | USA          | Zn<br>ClO <sub>2</sub><br>FMT<br>LF<br>GTE<br>Placebo     | ZnACE                  | n/a            | 7 d                          | n = 120<br>20-70 yr<br>♂/♀ |
| NCT04641195 <sup>†</sup>          | A Randomized Trial to Determine the Effect of Vitamin D and Zinc Supplementation for Improving Treatment Outcomes Among COVID-19 Patients in India                                                                                  | India        | Zn + VitD3<br>Zn (placebo)<br>VitD3 (placebo)<br>Placebo  | ZnGLU                  | 40 mg          | OD up to 8 wk                | n = 700<br>≥ 18 yr<br>♂/♀  |
| NCT04323228 <sup>†</sup>          | Anti-inflammatory/Antioxidant Oral Nutrition Supplementation on the Cytokine Storm and Progression of COVID-19: A Randomized Controlled Trial                                                                                       | Saudi Arabia | ONS with Zn<br>Placebo                                    | n/a                    | 5.7 mg         | 14 d                         | n = 40<br>18-65yr<br>♂/♀   |
| NCT04335084 <sup>†</sup>          | A Randomized, Double-Blind, Placebo-Controlled Phase IIa Study of Hydroxychloroquine, Vitamin C, Vitamin D, and Zinc for the Prevention of COVID-19 Infection                                                                       | USA          | Zn, HCQ, VitC, VitD<br>Zn, VitC, D (placebo)              | n/a                    | n/a            | 12 wk                        | n = 600<br>≥ 18 yr<br>♂/♀  |
| ACTRN126200000454976 <sup>†</sup> | High-dose intravenous zinc (HDIVZn) as adjunctive therapy in COVID-19 positive critically ill patients: A pilot randomized controlled trial                                                                                         | Australia    | Zn<br>Placebo                                             | ZnC                    | 0.5 mg/kg      | daily for 7 d                | n = 160<br>≥ 18 yr<br>♂/♀  |
| NCT04558424 <sup>#</sup>          | Randomized, Double -Blind, Placebo Controlled, Trial to Evaluate the Effect of                                                                                                                                                      | Bangladesh   | Zn + AscA/ST<br>Placebo/ST                                | ZnGLU                  | 220 mg         | OD for 10 d                  | n = 50<br>18-70 yr         |



|                                   |                                                                                                                                                                                                                        |         |                                                                  |           |        |                   |                                           |
|-----------------------------------|------------------------------------------------------------------------------------------------------------------------------------------------------------------------------------------------------------------------|---------|------------------------------------------------------------------|-----------|--------|-------------------|-------------------------------------------|
|                                   | Zinc and Ascorbic Acid Supplementation in COVID-19 Positive Hospitalized Patients in BSMMU                                                                                                                             |         |                                                                  |           |        |                   | ♂/♀                                       |
| PACTR202005622389003 <sup>#</sup> | Efficacy and safety of Hydroxychloroquine, Azithromycin and Zinc for the treatment of patients with SARS-CoV2 infection in Senegal: a dose ranging randomised trial. COVID-19                                          | Senegal | Zn/ST<br>HCQ+AZM                                                 | n/a       | 20 mg  | OD for 6 d        | n = 128<br>18-65 yr<br>♂/♀                |
| CTRI/2020/07/026340 <sup>#</sup>  | Prospective study to assess therapeutic role of Zinc in COVID-19 patients                                                                                                                                              | India   | Zn/ST                                                            | ZnS       | 100 mg | OD                | n = 100<br>18-80 yr<br>♂/♀                |
| NCT04898023 <sup>#</sup>          | Evaluation of Combination Zinc and Green Tea Extract Supplementation on Reduction in Symptom Duration and Severity Associated With Community Respiratory Viral Infections: a Randomized Control Trial (ZiPhenol Study) | USA     | Zn+GTE+AscA<br>Placebo                                           | ZnCIT     | 50 mg  | 2 cap BID for 5 d | n = 100<br>≥ 18 yr<br>♂/♀                 |
| NCT04377646 <sup>#</sup>          | A Study of Hydroxychloroquine and Zinc in the Prevention of COVID-19 Infection in Military Healthcare Workers (COVID-Milit)                                                                                            | Tunisia | Zn<br>Zn (placebo)<br>HCQ<br>HCQ (placebo)                       | elemental | 15 mg  | OD up to 2 mo     | n = 660<br>18-65 yr<br>♂/♀                |
| NCT04542993 <sup>††</sup>         | Can SARS-CoV-2 Viral Shedding in COVID-19 Disease be Reduced by Resveratrol-assisted Zinc Ingestion, a Direct Inhibitor of SARS-CoV-2-RNA Polymerase? A Single Blinded Phase II Protocol (Reszinate Trial)             | USA     | Zn + RSV<br>Zn + RSV (placebo)                                   | ZnPIC     | 50 mg  | TID for 5 d       | n = 60<br>18-75 yr<br>♂/♀                 |
| NCT04482686 <sup>††</sup>         | A Phase I Double-Blind Randomized Placebo-Controlled Trial of Combination Therapy to Treat COVID-19 Infection                                                                                                          | USA     | Zn<br>IVM<br>DOXY-Hcl<br>VitC<br>VitD3<br>Zn, VitC, D3 (placebo) | ZnS       | n/a    | 10 d              | n = 31 <sup>&amp;</sup><br>≥ 18 yr<br>♂/♀ |

ClinTI: Clinical Trial Identifier; n: number of patients; yr: year; mo: month; d: day; cap: capsules; *h.s.*: *hora somni*; OD: once daily; BID: twice a day; TID: three times a day; PO: *per os*; BSMMU: Bangabandhu Sheikh Mujib Medical University; QUE: quercetin; BM: bromelain; HCQ: hydroxychloroquine; IVM: ivermectin; DOXY: doxycycline; DOXY-Hcl: doxycycline hyclate; FMT: famotidine; LF: lactoferrin; RSV: resveratrol; AZM: azithromycin; AscA: ascorbic acid; ClO<sub>2</sub>: chlorine dioxide; PI: povidone iodine; KSK: Kabasura Kudineer; VitB12: vitamin B12; VitC: vitamin C; VitD: vitamin D; VitD3: vitamin D3; Zn: zinc; GTE: green tea extract; ZnGLU: zinc gluconate; ZnCIT: zinc citrate; ZnPIC: zinc picolinate; ZnS: zinc sulfate; ZnCl: zinc chloride; ZnACE: zinc acetate; ONS: oral nutrition supplement; (+): with, (-): without ST: standard treatment; n/a: not available. Recruitment status: \* complete, † recruiting, †† active, not recruiting. & Actual enrollment.

**Table S4.** Summary of clinical trials with copper (Cu) for COVID-19

| ClinTI                            | Official Title                                                                                                                                                                                                                                                                     | Country | Agents                                    | Cu dose | Frequency/Duration of Cu administration                 | Patient details            |
|-----------------------------------|------------------------------------------------------------------------------------------------------------------------------------------------------------------------------------------------------------------------------------------------------------------------------------|---------|-------------------------------------------|---------|---------------------------------------------------------|----------------------------|
| <b>Participants with COVID-19</b> |                                                                                                                                                                                                                                                                                    |         |                                           |         |                                                         |                            |
| CTRI/2020/07/026514 <sup>#</sup>  | A Phase-II, Open Label, Randomized Controlled Trial of Resveretrol-Copper Plus Standard Treatment Or Sodium-Copper-Chlorophyllin Plus Standard Treatment Versus Standard Treatment in Cancer patients with SARS-CoV-2 Infection who are Symptomatic Or have Pneumonia for COVID 19 | India   | RSV-Cu/ST<br>CHLN/ST<br>ST without RSV-Cu | 560 ng  | 1 tablet once every 6 hr from the date of randomization | n = 200<br>18-99 yr<br>♂/♀ |
| CTRI/2020/05/025337 <sup>#</sup>  | A Phase-II, Open Label, Randomized Controlled Trial Of Resveretrol-Copper Plus Standard Treatment Or Sodium-Copper-Chlorophyllin Plus Standard Treatment Versus Standard Treatment In Hospitalized Patients With Pneumonia Due To SARS-CoV-2 (COVID-19)                            | India   | RSV-Cu/ST<br>CHLN/ST<br>ST without RSV-Cu | 560 ng  | 1 tablet QID from the date of randomization             | n = 200<br>18-99 yr<br>♂/♀ |
| CTRI/2020/05/025336 <sup>#</sup>  | A Phase-III, Open Label, Randomized Controlled Trial Of Resveretrol-Copper Plus Standard Treatment Or Sodium-Copper-Chlorophyllin Plus Standard Treatment Versus Standard Treatment In Asymptomatic Or Mildly Symptomatic Patients With SARS-CoV-2 Infection (COVID-19)            | India   | RSV-Cu/ST<br>CHLN/ST<br>ST without RSV-Cu | 560 ng  | 1 tablet QID from the date of randomization             | n = 300<br>18-99 yr<br>♂/♀ |

ClinTI: Clinical Trial Identifier; n: number of patients; hr: hours; yr: year; ST: standard treatment; RSV-Cu: resveratrol-copper tablets; CHLN: chlorophyllin; QID: four times a day.  
 Recruitment status: <sup>#</sup> not yet recruiting.

**Table S5.** Summary of clinical trials with selenium (Se) for COVID-19

| ClinTI                            | Official Title                                                                                                                                                        | Country | Agents                  | Se dose            | Frequency/Duration of Se administration                                  | Patient details               |
|-----------------------------------|-----------------------------------------------------------------------------------------------------------------------------------------------------------------------|---------|-------------------------|--------------------|--------------------------------------------------------------------------|-------------------------------|
| <b>Participants with COVID-19</b> |                                                                                                                                                                       |         |                         |                    |                                                                          |                               |
| IRCT20210427051100N1*             | The effect of selenium supplementation on inflammatory markers and blood cells in patients with COVID-19 double-blind randomized clinical trial                       | Iran    | Se/ST<br>CG/Placebo/ST  | 200 µg             | daily for 14 d                                                           | n = 40<br>20-60 yr<br>♂/♀     |
| IRCT20190418043307N1*             | Investigating the effectiveness of selenium on recovery of hospitalized patients with COVID-19                                                                        | Iran    | Se/ST<br>CG/ST          | 200 µg             | daily for 14 d                                                           | n = 100<br>18-65 yr<br>♂/♀    |
| IRCT20160706028815N5*             | The effect of addition of selenium to treatment regimen of hospitalized patients with COVID-19 on the outcome of disease compared with control group                  | Iran    | Se/ST<br>CG/ST          | 1000 µg / 500 µg   | every 12 hr on the 1st d /<br>every 12 d from the 2nd d                  | n = 40<br>≥ 18 yr<br>♂/♀      |
| IRCT20190312043030N2*             | The effect of combination of selenium, vitamin C and methylprednisolone in acute respiratory distress syndrome mortality and morbidity from COVID-19                  | Iran    | Se/VitC/MPS/ST<br>CG/ST | 1 mg               | daily for 7 d                                                            | n = 40<br>18-90 yr<br>♂/♀     |
| IRCT20160919029870N3*             | Evaluation of the effectiveness of selenium added to intravenous nutrition therapy on mortality and duration of ICU hospitalization in patients with COVID-19 disease | Iran    | Se<br>CG/ST             | 1 mg / 500 µg      | at the beginning / IVI daily<br>during 15 min at 2 PM<br>every d for 5 d | n = 80<br>no age limit<br>♂/♀ |
| NCT04869579#                      | Selenium as a Potential Treatment for Moderately-ill, Severely-ill, and Critically-ill COVID-19 Patients                                                              | USA     | SeA/ST<br>Placebo/ST    | 2000 µg<br>1000 µg | on d 1<br>d 2-14                                                         | n = 100<br>≥ 18 yr<br>♂/♀     |

ClinTI: Clinical Trial Identifier; n: number of patients; d: day; hr: hours; min: minutes; Se: selenium; ST: standard treatment; CG: control group; VitC: vitamin C; MPS: methylprednisolone; IVI: intravenous infusion. Recruitment status: \* complete, # not yet recruiting.

**Table S6.** Summary of clinical trials with magnesium (Mg) for COVID-19

| ClinTI                            | Official Title                                                                                                                                                                                  | Country | Agents                                                       | Mg compound | Mg dose                                       | Frequency/Duration of Mg administration | Patient details            |
|-----------------------------------|-------------------------------------------------------------------------------------------------------------------------------------------------------------------------------------------------|---------|--------------------------------------------------------------|-------------|-----------------------------------------------|-----------------------------------------|----------------------------|
| <b>Participants with COVID-19</b> |                                                                                                                                                                                                 |         |                                                              |             |                                               |                                         |                            |
| IRCT20191211045691N1*             | Evaluation of the efficacy and safety of inhaled magnesium sulfate in combination with standard treatment in COVID-19 patients: a clinical trial                                                | Iran    | Mg/ST<br>CG/ST                                               | MgS         | 5 cc of a 20% INJ-V or<br>2 cc of a 50% INJ-V | every 8 h for 5 d                       | n = 100<br>18-80 yr<br>♂/♀ |
| IRCT20210702051763N1*             | The effect of vitamin D and magnesium supplementation on clinical symptoms, inflammatory markers and oxidative stress in patients with COVID-19: double-blind randomized control clinical trial | Iran    | Mg+VitD<br>VitD+Mg (placebo)<br>Mg+VitD (placebo)<br>Placebo | n/a         | 300 mg                                        | for 3 wk                                | n = 104<br>18-65 yr<br>♂/♀ |
| NCT04941703†                      | Investigation of Choice Alteration of the Gut Metagenome on COVID-19 Severity                                                                                                                   | USA     | Mg/PB<br>Placebo                                             | MgCIT       | 296 ml                                        | 1 bottle PO once<br>within a 4-h period | n = 30<br>18-99 yr<br>♂/♀  |
| CTRI/2020/06/026189#              | Randomized, Double Blind, Parallel Group Study of Vitamin D3 & Magnesium in COVID-19 Infection                                                                                                  | India   | VitD3+Mg                                                     | MgGly       | 250 mg                                        | BID for 14 d                            | n = 210<br>20-60 yr<br>♂/♀ |

ClinTI: Clinical Trial Identifier; n: number of patients; wk: weeks; d: day; h: hour; BID: twice a day; PO: *per os*; PB: probiotic; INJ-V: injectable vial; cc: cubic centimeter; MgS: magnesium sulfate; MgCIT: magnesium citrate; MgC: magnesium carbonate; MgGly: magnesium glycinate VitD: vitamin D; ST: standard treatment; CG: control group. Recruitment status: \* complete, † recruiting, # not yet recruiting.
